# Supplementary material
Source: PubMed Central journal article supplement (PMC3567739)
Supplement: 1b454f54201edffd152880fcfce5882a_genetics.112.142299-5.pdf [file 1b454f54201edffd152880fcfce5882a_genetics.112.142299-5.pdf]

**Table S2 Annotation of the contigs showing at least 3 fixed ( $D > 0.98$ ) differences between *G. firmus* and *G. pennsylvanicus*.**

Contigs in bold correspond to mitochondrial loci.

| Contig      | $\bar{D}$ | SNPs |       | TBLAST similarity                                               |
|-------------|-----------|------|-------|-----------------------------------------------------------------|
|             |           | N    | Fixed |                                                                 |
| 80          | 0.909     | 20   | 14    | Similar to eukaryotic translation initiation factor 3 subunit 1 |
| 625         | 0.865     | 18   | 13    | Transcription initiation factor                                 |
| 432         | 0.865     | 14   | 11    | Similar to <i>Tribolium castaneum</i> LOC398543 protein         |
| <b>70</b>   | 1.000     | 10   | 10    | <b>Cytochrome b</b>                                             |
| 310         | 0.998     | 9    | 9     | <b>NADH dehydrogenase subunit 2 (ND2)</b>                       |
| <b>7153</b> | 0.899     | 9    | 8     | Proliferating cell nuclear antigen ( <i>PCNA</i> )              |
| <b>142</b>  | 0.898     | 9    | 8     | <i>Gryllus pennsylvanicus</i> putative accessory gland          |
| 3104        | 0.825     | 11   | 8     | Similar to Charged multivesicular body protein 2B               |
| 1313        | 0.757     | 11   | 8     | Similar to pacifastin light chain                               |
| 2733        | 0.882     | 9    | 7     | Similar to <i>Gryllus bimaculatus</i> mRNA, GBcontig25049       |
| 136         | 0.882     | 9    | 7     | Mn-Superoxide dismutase ( <i>Sod2</i> )                         |
| <b>1002</b> | 0.855     | 9    | 7     | <b>Hypothetical protein. Mitochondrial?</b>                     |
| 448         | 0.790     | 9    | 7     | <b>tRNA-Lys, partial ATPase 8 (ATP8). Mitochondrial</b>         |
| 94          | 0.710     | 11   | 7     | Similar to <i>Gryllus bimaculatus</i> mRNA, GBcontig18903       |
| 454         | 1.000     | 6    | 6     | <b>Teleogryllus emma mitochondrion</b>                          |
| 755         | 1.000     | 6    | 6     | #N/A                                                            |
| 656         | 0.893     | 9    | 6     | <b>Teleogryllus emma mitochondrion</b>                          |
| 665         | 0.879     | 7    | 6     | <b>Teleogryllus emma mitochondrion</b>                          |
| <b>6023</b> | 0.867     | 7    | 6     | ns                                                              |
| <b>5214</b> | 0.865     | 7    | 6     | ns                                                              |

|             |              |          |          |                                                                   |
|-------------|--------------|----------|----------|-------------------------------------------------------------------|
| 618         | 1.000        | 5        | 5        | Conserved protein (similar to Cyclin-D1-binding protein 1)        |
| 1341        | 1.000        | 5        | 5        | Citrate lyase beta-like protein                                   |
| 1699        | 1.000        | 5        | 5        | Similar to <i>Tribolium castaneum</i> ADP ribosylation factor 79F |
| <b>1774</b> | 1.000        | 5        | 5        | ns                                                                |
| 1903        | 1.000        | 5        | 5        | #N/A                                                              |
| 1978        | 1.000        | 5        | 5        | similar to conserved hypothetical protein                         |
| <b>5368</b> | 1.000        | 5        | 5        | ns                                                                |
| 543         | 0.823        | 7        | 5        | Similar to <i>Gryllus bimaculatus</i> mRNA, GBcontig05368         |
| 280         | 0.800        | 15       | 5        | Ubiquinol-cytochrome c reductase                                  |
| 2185        | 0.717        | 13       | 5        | ns                                                                |
| 1414        | 0.682        | 8        | 5        | Similar to mitochondrial ribosomal protein L36                    |
| 1309        | 1.000        | 4        | 4        | Similar <i>Tribolium castaneum</i> similar to B52 CG10851-PA      |
| 1412        | 1.000        | 4        | 4        | Insect conserved protein                                          |
| 1721        | 1.000        | 4        | 4        | Similar to <i>Gryllus bimaculatus</i> mRNA, GBcontig28218         |
| 5711        | 1.000        | 4        | 4        | GalNAc transferase 6-like                                         |
| 7164        | 1.000        | 4        | 4        | ns                                                                |
| 14713       | 1.000        | 4        | 4        | ns                                                                |
| 855         | 0.956        | 7        | 4        | Similar to <i>Tribolium castaneum</i> AGAP003463-PA               |
| <b>2020</b> | <b>0.877</b> | <b>6</b> | <b>4</b> | <b><i>Prumna arctica</i> mitochondrion, complete genome</b>       |
| 267         | 0.825        | 6        | 4        | Conserved hypothetical protein                                    |
| 730         | 0.823        | 5        | 4        | Conserved hypothetical protein                                    |
| <b>874</b>  | <b>0.821</b> | <b>5</b> | <b>4</b> | <b>ES1 protein homolog, mitochondrial-like</b>                    |
| 1231        | 0.816        | 5        | 4        | Glutathione S-transferase                                         |
| 4679        | 0.810        | 5        | 4        | Conserved hypothetical protein (zinc finger protein)              |

|      |       |    |   |                                                            |
|------|-------|----|---|------------------------------------------------------------|
| 7046 | 0.777 | 8  | 4 | ns                                                         |
| 1847 | 0.773 | 9  | 4 | Flap endonuclease-1                                        |
| 1177 | 0.773 | 6  | 4 | Small nucleolar RNA                                        |
| 3433 | 0.704 | 6  | 4 | Similar to zinc finger protein                             |
| 989  | 0.688 | 8  | 4 | <i>Gryllus pennsylvanicus</i> hypothetical accessory gland |
| 99   | 0.667 | 8  | 4 | Similar to extracellular proteinase inhibitor              |
| 726  | 0.609 | 11 | 4 | Similar to <i>Gryllus bimaculatus</i> mRNA, GBcontig01128  |
| 2864 | 0.605 | 12 | 4 | Conserved hypothetical protein                             |
| 5727 | 0.524 | 9  | 4 | Similar to CSL-type zinc finger protein                    |
| 2989 | 0.444 | 14 | 4 | #N/A                                                       |
| 87   | 1.000 | 3  | 3 | Similar to <i>Gryllus bimaculatus</i> mRNA, GBcontig31800  |
| 580  | 1.000 | 3  | 3 | Similar to <i>Nasonia vitripennis</i> p15-2a protein       |
| 937  | 1.000 | 3  | 3 | Dynactin subunit 4 ( <i>Dctn4</i> )                        |
| 963  | 1.000 | 3  | 3 | Similar to growth hormone-inducible soluble protein        |
| 1101 | 1.000 | 3  | 3 | #N/A                                                       |
| 1275 | 1.000 | 3  | 3 | Protease regulatory subunit S10B                           |
| 1306 | 1.000 | 3  | 3 | Similar to translocase of outer membrane 7                 |
| 1374 | 1.000 | 3  | 3 | Conserved protein: unknown                                 |
| 1415 | 1.000 | 3  | 3 | Myosin essential light chain                               |
| 1513 | 1.000 | 3  | 3 | UBX domain-containing protein                              |
| 1667 | 1.000 | 3  | 3 | Similar to <i>Gryllus bimaculatus</i> mRNA, GBcontig12028  |
| 2182 | 1.000 | 3  | 3 | Histone h2a                                                |
| 2658 | 1.000 | 3  | 3 | ns                                                         |
| 3084 | 1.000 | 3  | 3 | Similar to <i>Glossina morsitans</i> mRNA                  |

|              |              |          |          |                                                                 |
|--------------|--------------|----------|----------|-----------------------------------------------------------------|
| 3432         | 1.000        | 3        | 3        | Similar to <i>DnaJ</i> ( <i>Hsp40</i> )                         |
| 3566         | 1.000        | 3        | 3        | ns                                                              |
| 3758         | 1.000        | 3        | 3        | <b>NADH dehydrogenase. Mitochondrial</b>                        |
| 3843         | 1.000        | 3        | 3        | Translation initiation factor 4 gamma                           |
| <b>4655</b>  | 1.000        | 3        | 3        | Conserved protein: unknown                                      |
| 5777         | 1.000        | 3        | 3        | Similar to transport and Golgi organization 1 ( <i>Tango1</i> ) |
| 6030         | 1.000        | 3        | 3        | Ethanolaminephosphotransferase                                  |
| 8373         | 1.000        | 3        | 3        | Asparagine synthetase                                           |
| 9851         | 1.000        | 3        | 3        | ns                                                              |
| <b>14741</b> | 1.000        | 3        | 3        | Similar to eritrophin-like protein 1                            |
| 6271         | 0.995        | 3        | 3        | ns                                                              |
| 6026         | 0.994        | 3        | 3        | Omega-amidase ( <i>NIT2-B</i> )                                 |
| 4450         | 0.989        | 3        | 3        | Similar to <i>Gryllus bimaculatus</i> mRNA, GBcontig24459       |
| 861          | 0.980        | 4        | 3        | Ribulose-5-phosphate-3-epimerase mRNA                           |
| 586          | 0.974        | 4        | 3        | ns                                                              |
| 1147         | 0.969        | 4        | 3        | protein ERGIC-53-like                                           |
| 1392         | 0.952        | 4        | 3        | delta-coatomer protein                                          |
| 1369         | 0.950        | 5        | 3        | Acyrtosiphon pisum outer dense fiber protein 3-like             |
| 827          | 0.826        | 5        | 3        | aspartate aminotransferase                                      |
| 1790         | 0.790        | 6        | 3        | ns                                                              |
| 3732         | 0.788        | 4        | 3        | #N/A                                                            |
| <b>1084</b>  | <b>0.778</b> | <b>4</b> | <b>3</b> | <b>Cytochrome oxidase I (<i>COI</i>). Mitochondrial</b>         |
| 2100         | 0.773        | 4        | 3        | Fructose-1,6-bisphosphatase                                     |
| 2292         | 0.700        | 7        | 3        | Similar to <i>Monodelphis domestica</i> ORF                     |

|             |       |    |   |                                                               |
|-------------|-------|----|---|---------------------------------------------------------------|
| 2           | 0.673 | 7  | 3 | #N/A                                                          |
| 5131        | 0.652 | 5  | 3 | Golgi-associated microtubule-binding protein ( <i>HOOK3</i> ) |
| 367         | 0.635 | 6  | 3 | Similar to Tm-139 signal peptidase complex                    |
| 4914        | 0.630 | 5  | 3 | ns                                                            |
| 541         | 0.630 | 5  | 3 | Similar to <i>Tribolium castaneum</i> predicted protein       |
| 1372        | 0.624 | 8  | 3 | ns                                                            |
| 5067        | 0.618 | 6  | 3 | Similar to <i>Gryllus bimaculatus</i> mRNA, GBcontig12980     |
| 6557        | 0.605 | 6  | 3 | Similar to <i>Gryllus bimaculatus</i> mRNA, GBcontig07377     |
| <b>4913</b> | 0.426 | 16 | 3 | Similar to <i>Anopheles gambiae</i> mRNA                      |
| 2570        | 0.424 | 13 | 3 | Similar to <i>Gryllus bimaculatus</i> mRNA, GBcontig26520     |

---
