# Supplementary material
Source: PubMed Central journal article supplement (PMC3567739)
Supplement: 247fb1eb060254a9ab588839ece3bf16_genetics.112.142299-6.pdf [file 247fb1eb060254a9ab588839ece3bf16_genetics.112.142299-6.pdf]

**File S1**

**Library PCR-primers**

>TI-MID-B\_plusT.seq  
CCTATCCCCTGTGTGCCTTGGCAGTCTCAGT

>Ti-MID1-A\_plusT.seq  
CCATCTCATCCCTGCGTGTCTCCGACTCAGACGAGTGC GTT
