# Supplementary material
Source: PubMed Central journal article supplement (PMC3567739)

List of highly divergent contigs

SNPs/contig

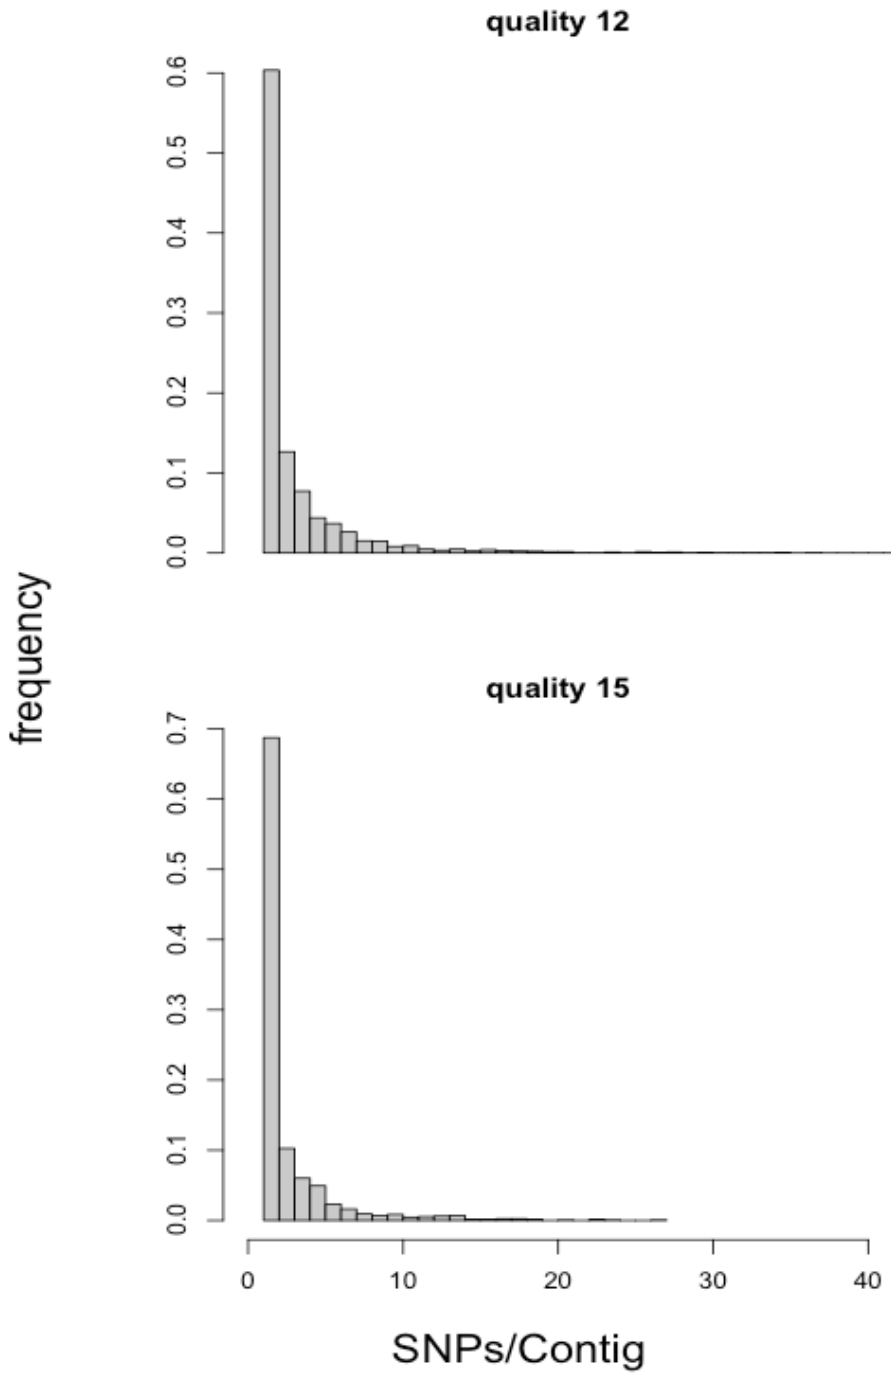

fixed SNPs/Contig

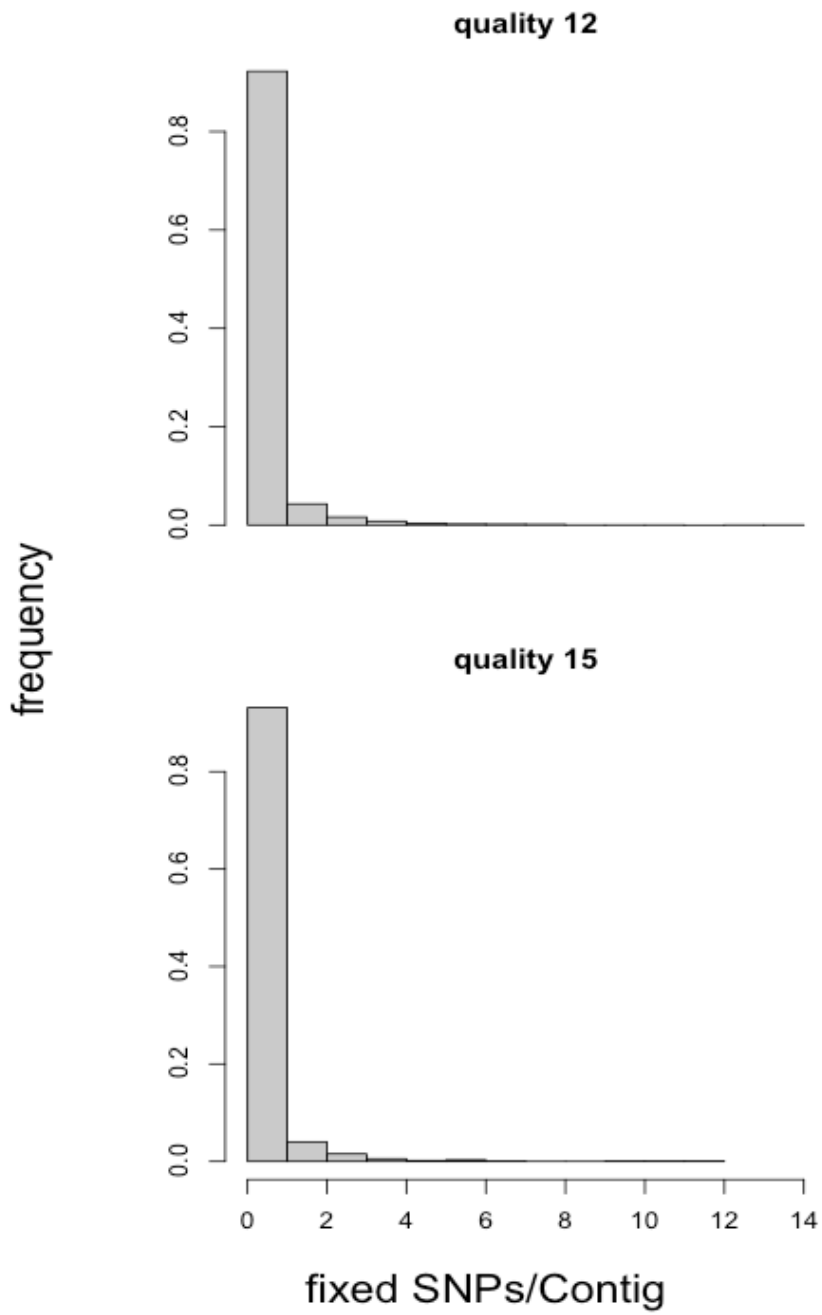

Dmean (for contigs with at least 3 SNPs)

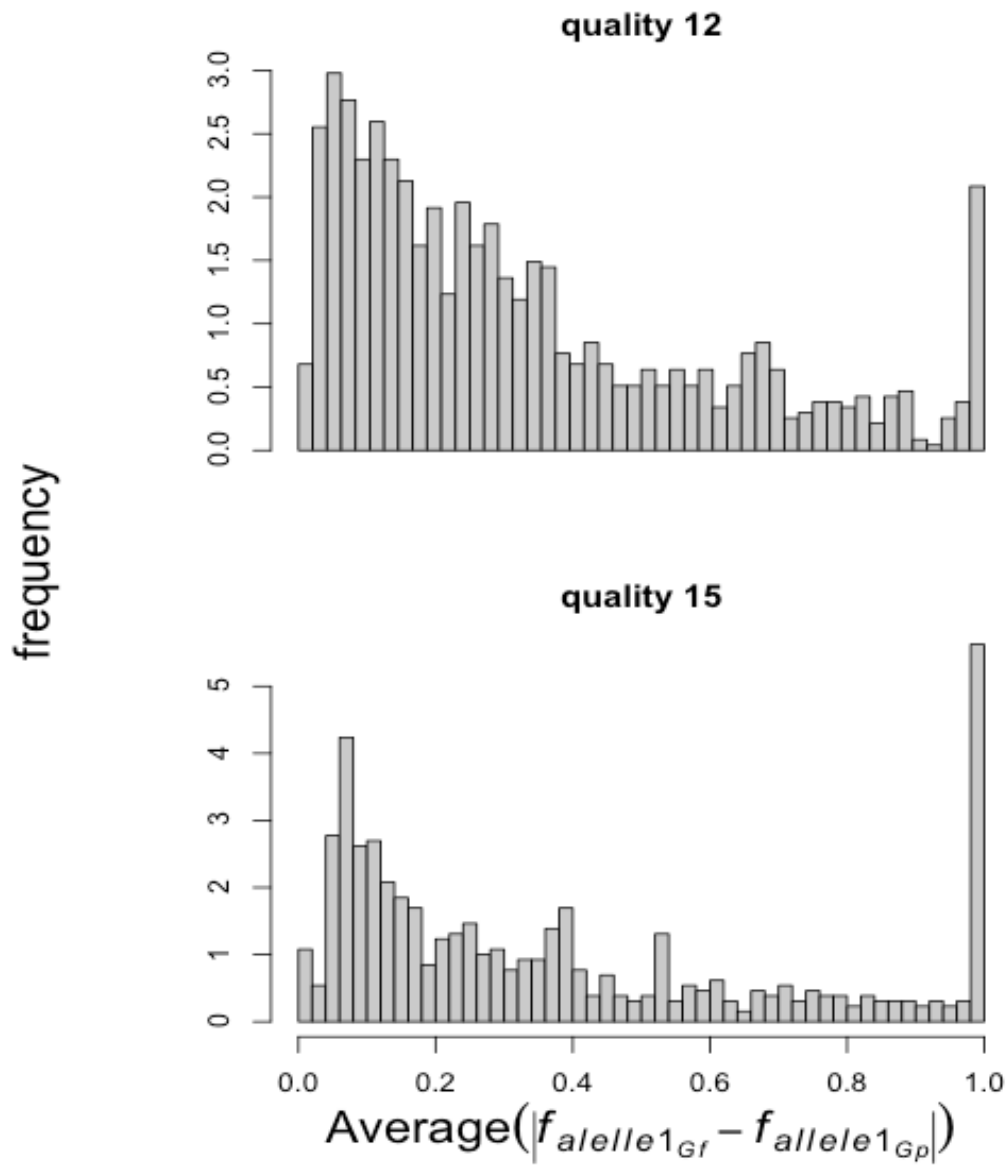

D mean (and STError)

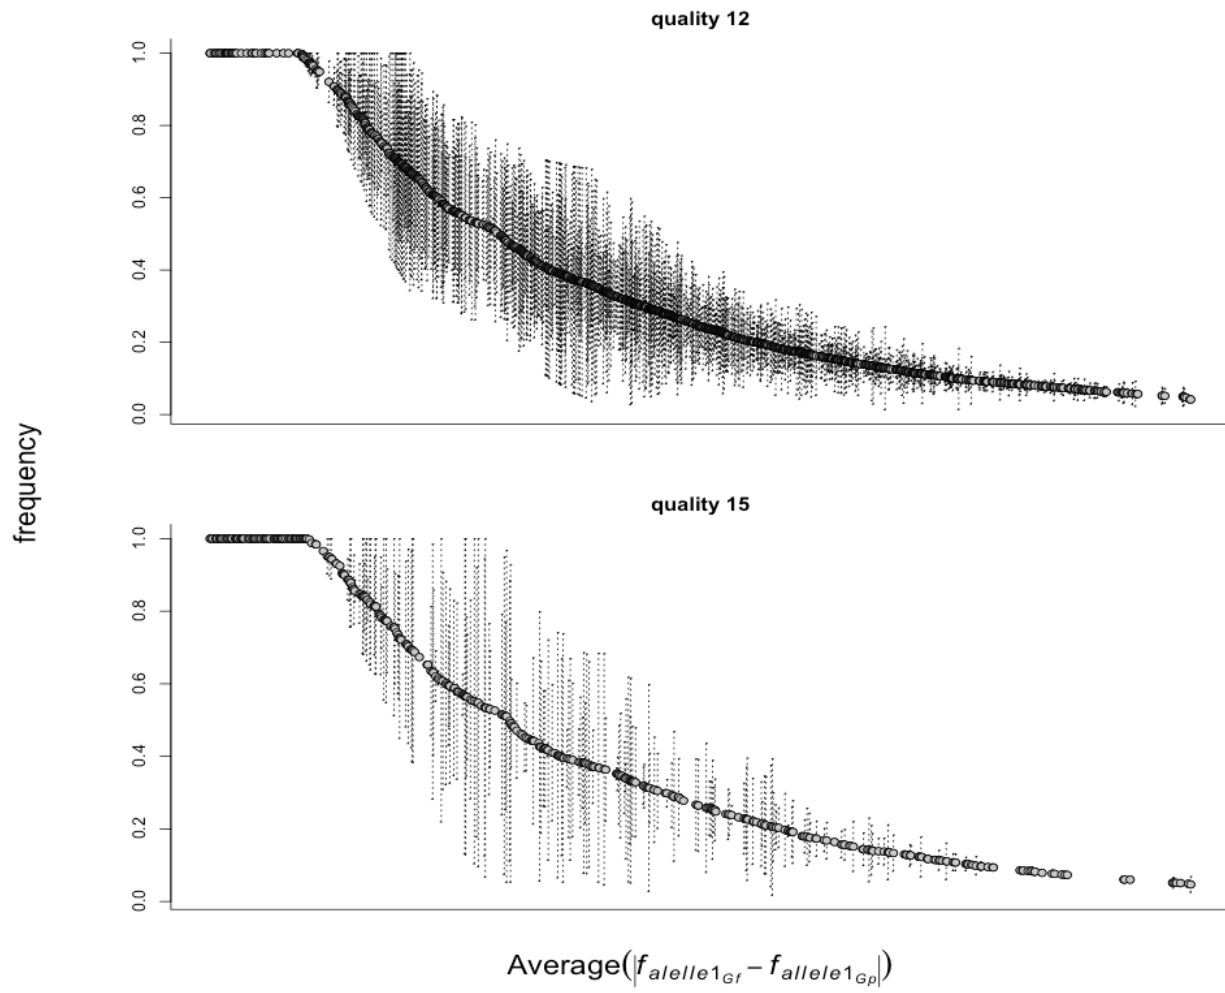

Correlation between Dmean (qual 12 and qual 15)

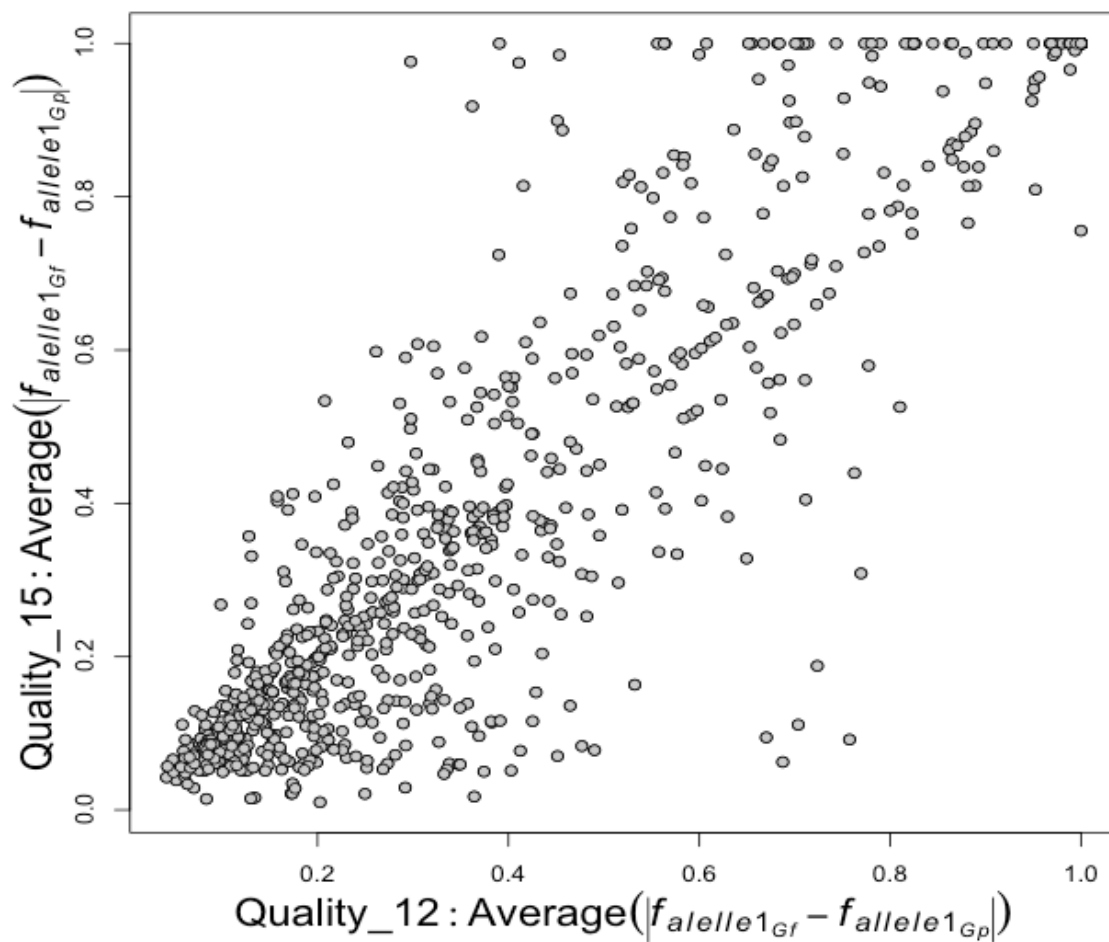

Correlation between # of SNPs (qual 12 and 15)

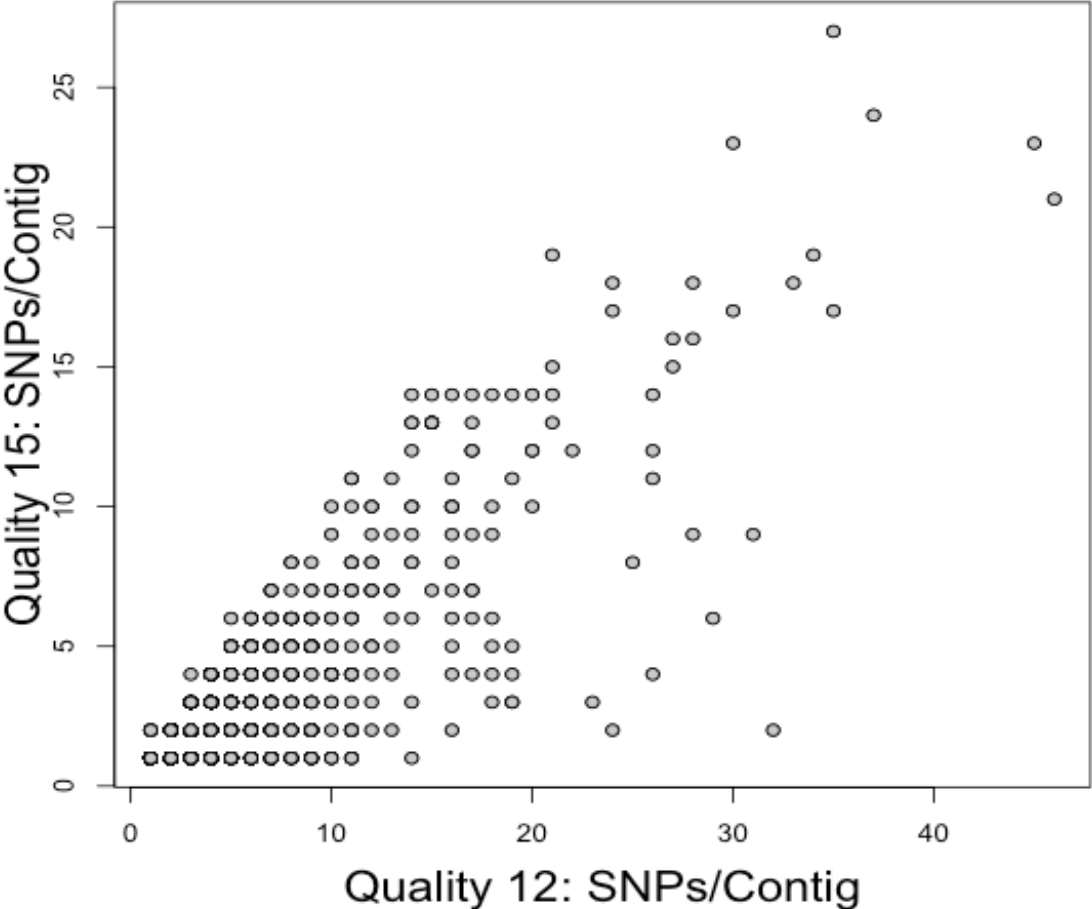

Supplement: 3331050bd9b0de221e4a805b6e4dc435_genetics.112.142299-4.pdf [file 3331050bd9b0de221e4a805b6e4dc435_genetics.112.142299-4.pdf]
